# Supplementary material
Source: PubMed Central journal article supplement (PMC5367962)
Supplement: NIHMS841765-supplement-01.pdf [file NIHMS841765-supplement-01.pdf]

**eTable 1.** Comparison of Outcomes in Patients with Cholecystostomy Tube vs the Unmatched Patients

| <b>Outcomes</b>                   | <b>Cholecystostomy tube placement</b> | <b>No cholecystostomy tube placement</b> | <b>Odds ratio, hazard ratio, or beta coefficient</b> |
|-----------------------------------|---------------------------------------|------------------------------------------|------------------------------------------------------|
| Mortality, n (%)                  |                                       |                                          |                                                      |
| In-hospital                       | 135 (24.0)                            | 382 (22.6)                               | OR 1.08 (0.86-1.35)                                  |
| 30-d                              | 219 (38.9)                            | 553 (32.7)                               | HR 1.26(1.05-1.50)*                                  |
| 90-d                              | 263 (46.7)                            | 668 (39.6)                               | HR 1.26(1.08-1.46)*                                  |
| 2-y                               | 365 (64.8)                            | 998 (59.1)                               | HR 1.19(1.04-1.36)*                                  |
| Readmission, n (%)                |                                       |                                          |                                                      |
| 30 d                              | 82 (14.6)                             | 89 (5.3)                                 | HR 2.93(2.12-4.05)*                                  |
| 90 d                              | 121 (21.5)                            | 115 (6.8)                                | HR 3.48(2.60-4.64)*                                  |
| Within 2 y                        | 158 (28.1)                            | 154 (9.1)                                | HR 3.08(2.87-4.90)*                                  |
| Length of stay, d, median (q1,q3) |                                       |                                          |                                                      |
| During index hospital admission   | 13 (6, 16)                            | 10 (4, 12)                               | Beta 0.91 (0.63)†                                    |
| During 90-d period                | 15 (7, 20)                            | 11 (4, 13)                               | Beta 2.56 (1.29)†                                    |
| Cholecystectomy, n (%)            |                                       |                                          |                                                      |
| On index admission                | 63 (11.2)                             | 995 (58.9)                               | OR 0.08 (0.06-0.11)                                  |
| Any time during 2 y               | 188 (33.4)                            | 1,091 (64.6)                             | HR 0.26(0.21-0.31)*                                  |
| In-hospital occurrences, n (%)    |                                       |                                          |                                                      |
| Surgical site infection           | 34 (6.4)                              | 66 (3.9)                                 | OR 1.57 (1.03-2.39)                                  |

|                         |            |            |                     |
|-------------------------|------------|------------|---------------------|
| Urinary tract infection | 192 (34.1) | 608 (36.0) | OR 0.92 (0.75-1.12) |
| Pneumonia               | 193 (34.3) | 590 (34.9) | OR 0.97 (0.89-1.19) |
| Deep vein thrombosis    | 47 (8.4)   | 135 (8.0)  | OR 1.05 (0.74-1.50) |
| Embolism                | 26 (4.6)   | 66 (3.9)   | OR 1.20 (0.75-1.92) |
| MI                      | 76 (13.5)  | 175 (10.4) | OR 1.35 (1.02-1.81) |

\*Hazard ratio derived from Cox Proportional Hazard models.

†Point estimation or the difference of the pooled mean.
